# Supplementary material
Source: PubMed Central journal article supplement (PMC8859990)
Supplement: NIHMS1778344-supplement-Suppl.pdf [file NIHMS1778344-supplement-Suppl.pdf]

## SUPPLEMENTAL MATERIALS

### Extended Data Figures 1-8

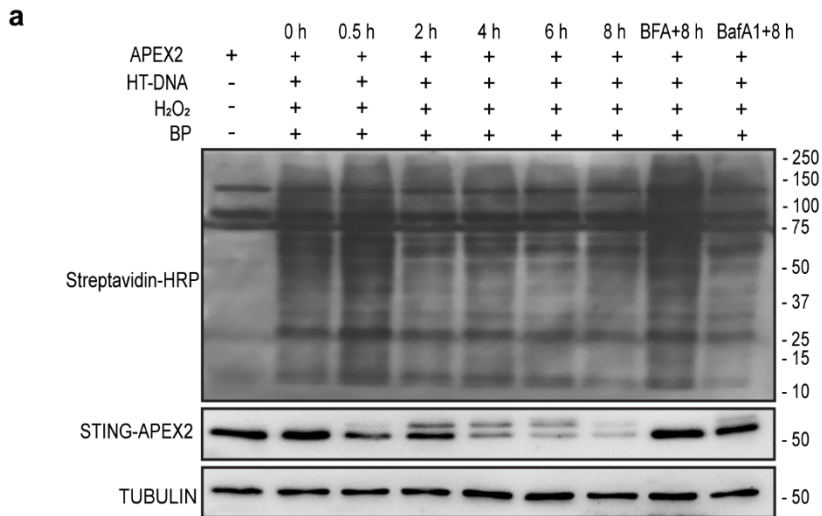

#### Extended Data Fig.1| STING-APEX2 proximity labeling.

a, Immunoblot analysis of cell lysates. STING-APEX2 MEFs were mock-treated or stimulated with HT-DNA (1  $\mu$ g/ml) for indicated times with or without treatment of Brefeldin A (BFA) or Bafilomycin A1 (BafA1) (top). Then, proximity labeling was performed and biotinylated proteins were detected by streptavidin-HRP.

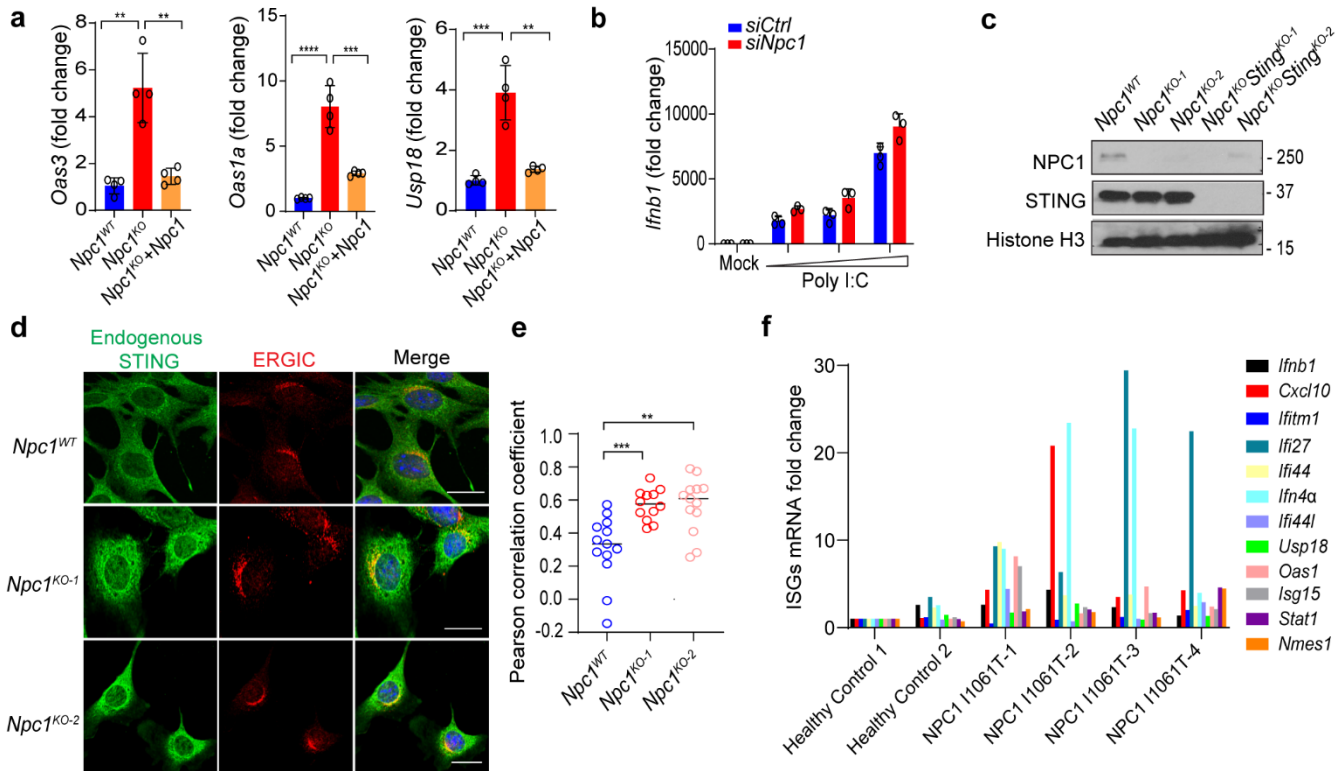

**Extended Data Fig.2| NPC1 deficiency primes STING trafficking and activation of ISGs.**

**a**, qRT-PCR analysis of the baseline ISGs expression (*Oas3*, *Oas1a*, *Usp18*) in *Npc1*<sup>WT</sup>, *Npc1*<sup>KO</sup> and *Npc1*<sup>KO</sup> stably expressing wild-type *Npc1* (n=4).

**b**, qRT-PCR analysis of *Ifnb1* mRNA expression in WT and *Npc1* knockdown MEFs after stimulation with increasing amount of Poly I:C (0, 1, 2, 4 μg/ml) for 3 h (n=3).

**c**, Immunoblot analysis of the indicated proteins (left) in *Npc1*<sup>WT</sup>, *Npc1*<sup>KO</sup>, *Npc1*<sup>KO</sup>*STING*<sup>KO</sup> MEFs.

**d**, Fluorescent microscopy analysis of endogenous STING localization at the resting-state in *Npc1*<sup>WT</sup> and two independent clones of *Npc1*<sup>KO</sup> MEFs. Endogenous STING in green, an ERGIC marker (ERGIC53) in red and DAPI in blue. Scale bar, 10 μm.

**e**, Quantification of STING colocalization with the ERGIC in **d**.

**f**, qRT-PCR analysis of the baseline ISGs expression in fibroblasts from healthy controls (n=2) and unrelated *NPC1*<sup>I1061T</sup> patients (n=4).

**a**, **b**, Data are shown as means ± s.d. **a**, **e**, Unpaired two-tailed Student's *t*-test. \*\* p < 0.01, \*\*\* p < 0.001, \*\*\*\* p < 0.0001. Data are representative of at least two independent experiments.

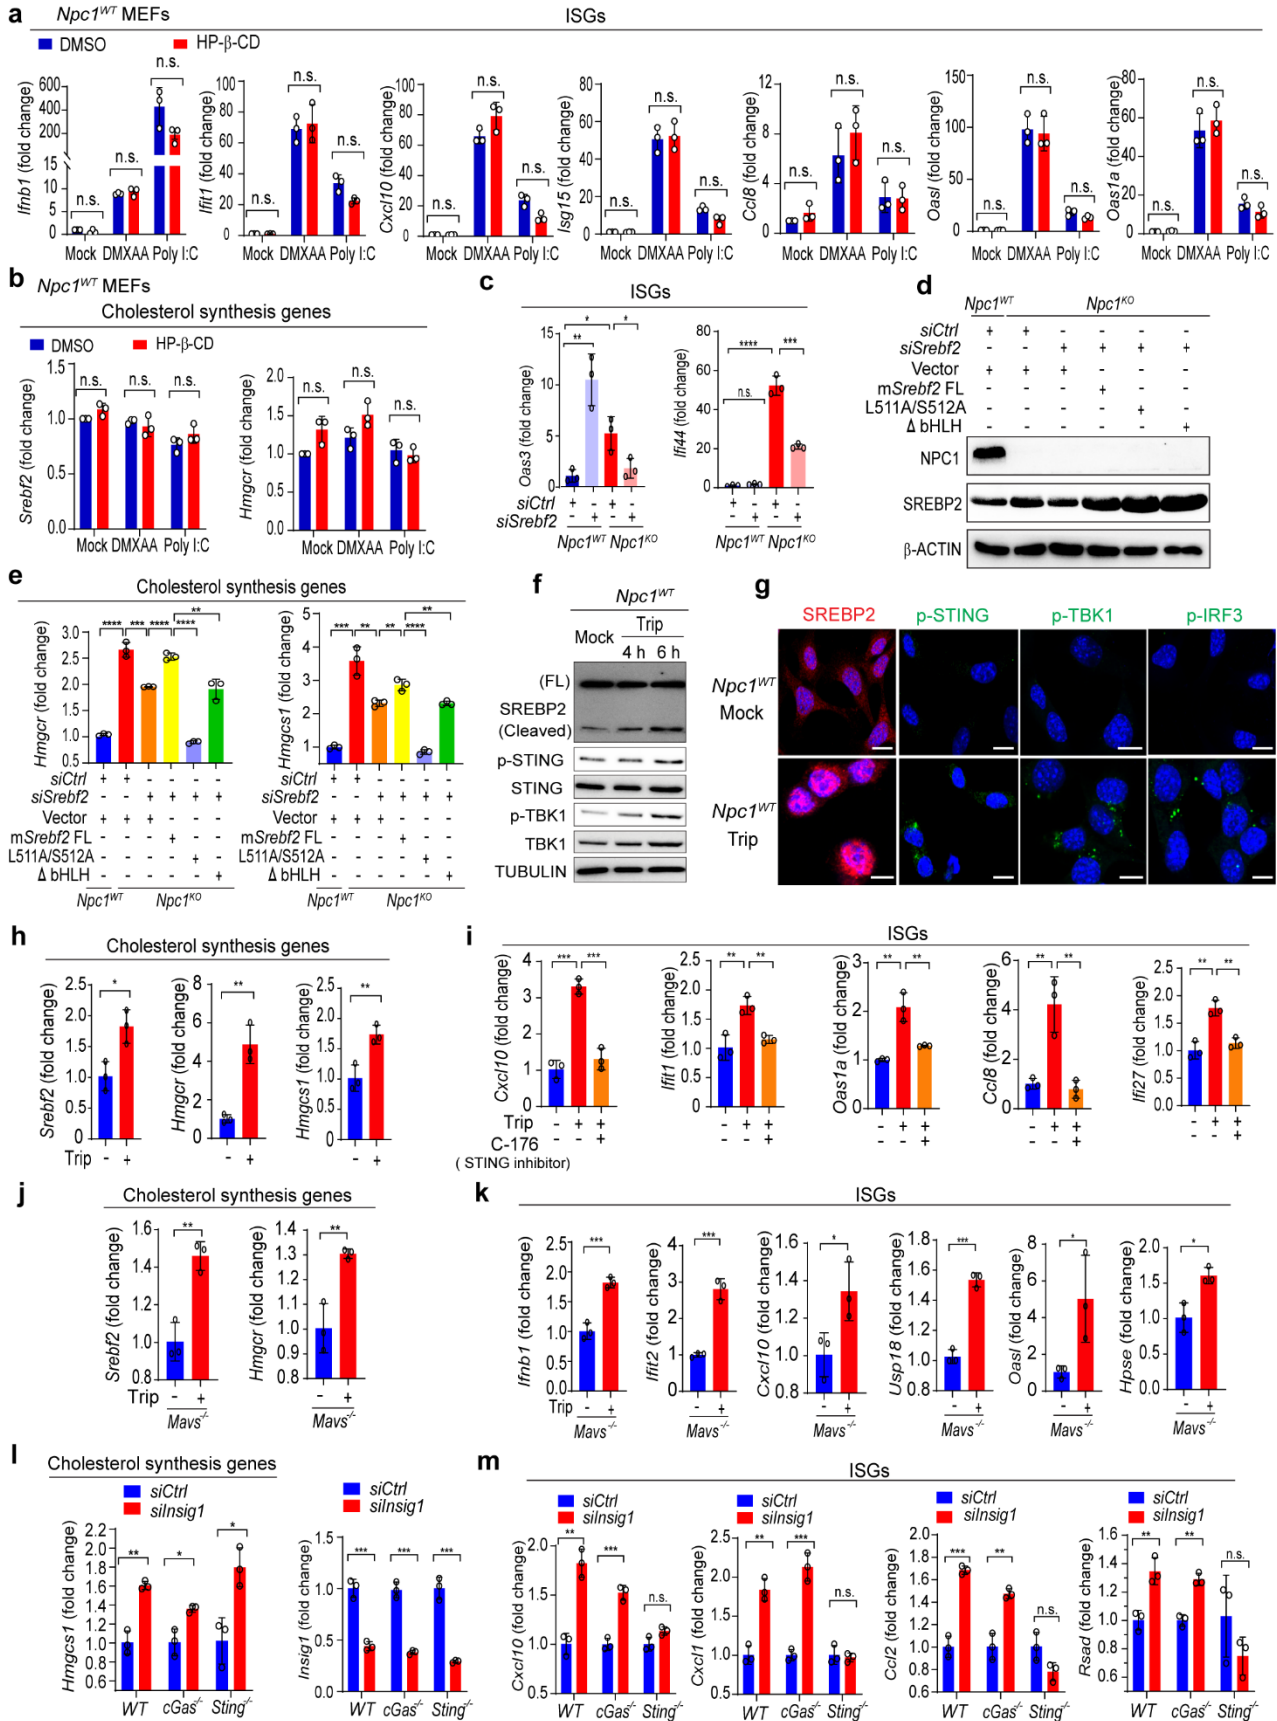

**Extended Data Fig.3| SREBP2 primes STING signaling independently of cGAS or MAVS in *Npc1*-deficient cells.**

**a, b**, qRT-PCR analysis of mock-, DMXAA- (50 µg/ml, 2 h) or poly(I:C)- (1 µg/ml, 2 h) induced expression of ISGs (**a**) and cholesterol synthesis genes (**b**) with mock- or HP-β-CD treatment (8 h) in *Npc1*<sup>WT</sup> MEFs (n=3).

**c**, qRT-PCR analysis of baseline ISGs expression in *Npc1*<sup>WT</sup> and *Npc1*<sup>KO</sup> MEFs transfected with *si-control* or *si-Srebf2* for 48 h (n=3).

**d**, Immunoblot analysis of the indicated proteins (left) in *Npc1*<sup>WT</sup>, *Npc1*<sup>KO</sup>, *Npc1*<sup>KO</sup>*Srebf2*<sup>KD</sup> and *Npc1*<sup>KO</sup>*Srebf2*<sup>KD</sup> MEFs reconstituted with SREBP2 wild-type or transcription-inactive mutants (L511A/S512A, ΔbHLH).

**e**, qRT-PCR analysis of cholesterol synthesis genes expression in *Npc1*<sup>WT</sup>, *Npc1*<sup>KO</sup>, *Npc1*<sup>KO</sup>*Srebf2*<sup>KD</sup> and *Npc1*<sup>KO</sup>*Srebf2*<sup>KD</sup> MEFs reconstituted with SREBP2 wild-type or transcription-inactive mutants (L511A/S512A, ΔbHLH) (n=3).

**f**, Immunoblot analysis of the SREBP2 activation and STING signaling cascade in *Npc1*<sup>WT</sup> MEFs treated with mock or triparanol (14 µM) for indicated time (shown on the top). Cleaved SREBP2 and phospho- and total- proteins of the STING pathway blotted are showing on the left.

**g**, Fluorescent microscopy analysis of cleaved SREBP2 nuclear translocation (red) as well as p-STING (green), p-TBK1(green) and p-IRF3 (green) staining in *Npc1*<sup>WT</sup> MEFs treated with mock or triparanol (14 µM) for 6 h. DAPI (blue), Scale bar, 10 µm.

**h**, qRT-PCR analysis of cholesterol synthesis genes in BMDMs mock-treated or triparanol-treated (14 µM) for 12 h (n=3).

**i**, qRT-PCR analysis of baseline ISGs expression in BMDMs mock-treated or triparanol-treated (14 µM) alone or in combination with STING inhibitor C-176 (0.5 µM) for 12 h (n=3).

**j, k**, qRT-PCR analysis of cholesterol synthesis genes (**j**) and ISGs (**k**) expression in *Mavs*<sup>-/-</sup> BMDMs mock-treated or triparanol-treated (14 µM) for 12 h (n=3).

**l, m**, qRT-PCR analysis of cholesterol synthesis gene *Hmgcs1*, knockdown efficiency of *Insig1* (**l**), and ISGs expression (**m**) in WT, *cGas*<sup>-/-</sup> and *Sting*<sup>-/-</sup> MEFs (n=3).

**a-c, e, h-m**, Data are shown as means ± s.d. Unpaired two-tailed Student's *t*-test. \*p < 0.05, \*\*p < 0.01, \*\*\*p < 0.001, \*\*\*\*p < 0.0001, n.s. not significant. Data are representative of at least three independent experiments.

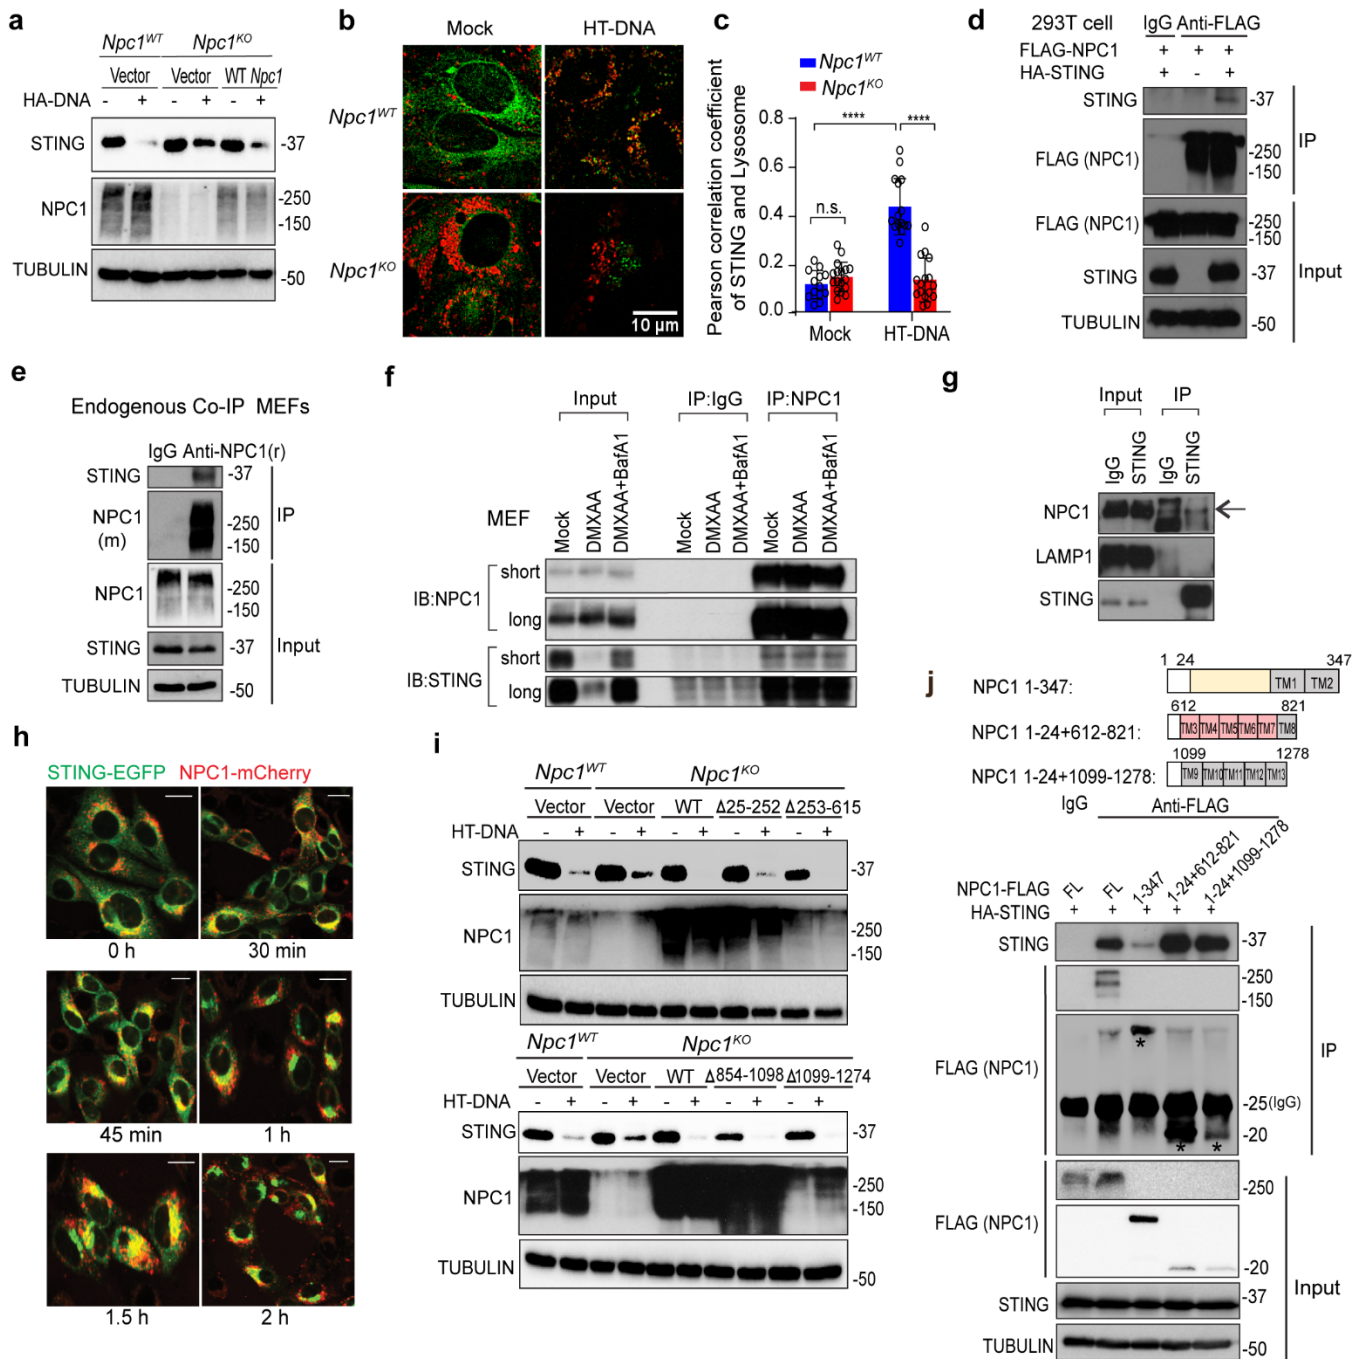

**Extended Data Fig.4| NPC1 interacts with STING and mediates STING lysosomal degradation.**

**a**, Immunoblot analysis of STING degradation in *Npc1<sup>WT</sup>*, *Npc1<sup>KO</sup>* or *Npc1<sup>KO</sup>* MEFs stably expressing wild-type NPC1. Cells were mock-treated or stimulation with HT-DNA (1  $\mu$ g/ml) for 8 h.

**b**, Live-cell microscopy images of STING-EGFP and lysosomes. *Npc1<sup>WT</sup>* and *Npc1<sup>KO</sup>* MEFs stably expressing STING-EGFP were mock-treated (left) or stimulated with HT-DNA (right, 4 µg/ml). STING-EGFP in green and LysoTracker-Red in red. Scale bar, 10 µm.

**c**, Quantification of STING and lysosome colocalization in **b**.

**d**, Immunoblot analysis of NPC1 and STING co-IP in HEK293T cells. HEK293T cells were transfected with indicated plasmids (top), and 24 h later, anti-IgG (mouse) or anti-FLAG was used to pull down. HA-STING co-IP was analyzed by anti-STING immunoblot. Whole-cell lysates were blotted by anti-FLAG (NPC1), anti-STING and anti-TUBULIN as input.

**e**, Immunoblot analysis of endogenous STING and NPC1 co-IP in wild-type MEFs. Anti-IgG (rabbit) or Anti-NPC1 (rabbit) was used to pull down. Both IP and lysate were blotted for endogenous STING (rabbit), NPC1 (mouse) and TUBULIN.

**f**, Immunoblot analysis of endogenous STING and NPC1 co-IP in wild-type MEFs with mock-treated, DMXAA-(30 µg/ml, 8 h) treated or DMXAA combined with Bafilomycin A1 treated (to prevent STING degradation). Anti-IgG (rabbit) or Anti-NPC1 (rabbit) was used to pull down. Both IP and lysate input were blotted for endogenous STING (rabbit) and NPC1 (mouse).

**g**, Immunoblot analysis of endogenous STING interaction with NPC1 or LAMP1 in wild-type MEFs. Anti-IgG (rabbit) or Anti-STING (rabbit) was used for pull-down. Both IP and lysate input were blotted for endogenous STING, NPC1 or LAMP1.

**h**, Live-cell fluorescent microscopy analysis of STING-EGFP and NPC1-mCherry localization. *Npc1<sup>KO</sup>Sting<sup>KO</sup>* MEFs stably expressing STING-EGFP (green) and NPC1-mCherry (red) were stimulated with HT-DNA (4 µg/ml) and imaged at indicated time. Scale bar, 10 µm.

**i**, Immunoblot analysis of STING degradation in *Npc1<sup>WT</sup>*, *Npc1<sup>KO</sup>* or *Npc1<sup>KO</sup>* MEFs stably expressing indicated NPC1 truncations. Cells were mock-treated or stimulated with HT-DNA (1 µg/ml) for 8 h. Cell lysates were analyzed for proteins indicated on the left.

**j**, Immunoblot analysis of STING interaction with NPC1 transmembrane bundles in HEK293T cells. HEK293T cells were transfected with indicated plasmids (top), and 24 h later, anti-IgG (mouse) or anti-FLAG (mouse) was used for pull down. Both IP and whole-cell lysates were analyzed by anti-FLAG, anti-STING and anti-TUBULIN. Data are representative of at least two independent experiments.



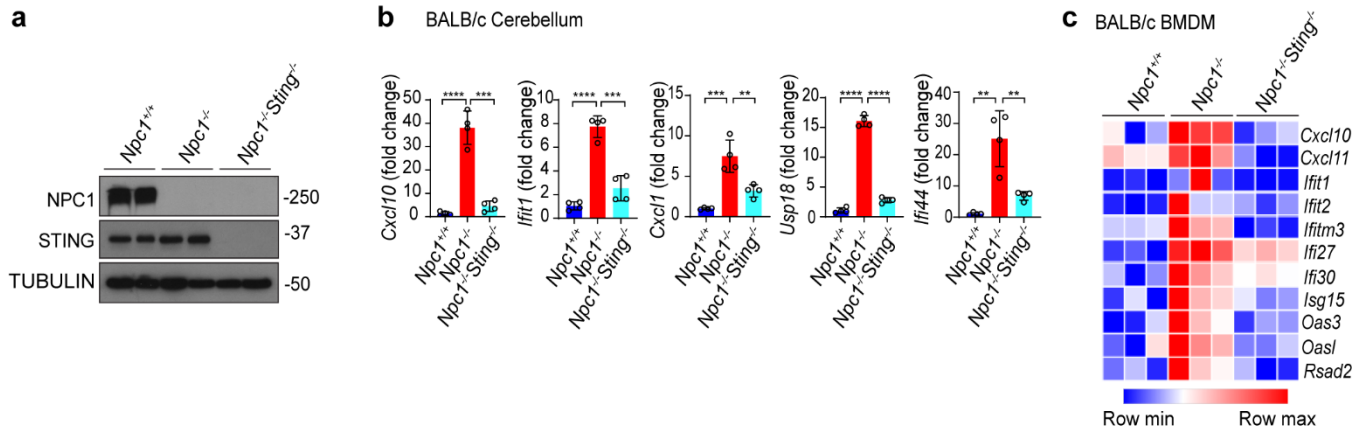

**Extended Data Fig.5| STING drives neuroinflammation in *Npc1*<sup>-/-</sup> mice.**

**a**, Immunoblot analysis of the indicated proteins (left) in BALB/c *Npc1*<sup>+/+</sup>, *Npc1*<sup>-/-</sup> and *Npc1*<sup>-/-</sup>*Sting*<sup>-/-</sup> mouse whole brain lysates (n=2).

**b**, qRT-PCR analysis of ISGs expression in BALB/c *Npc1*<sup>+/+</sup>, *Npc1*<sup>-/-</sup> and *Npc1*<sup>-/-</sup>*Sting*<sup>-/-</sup> mouse cerebellum (n=4).

**c**, A heatmap showing ISGs expression in BALB/c *Npc1*<sup>+/+</sup>, *Npc1*<sup>-/-</sup> and *Npc1*<sup>-/-</sup>*Sting*<sup>-/-</sup> mouse BMDMs (n=3). Each ISG mRNA expression level was measured by qRT-PCR.

**b**, Data shown as means ± s.d. Unpaired two-tailed Student's *t*-test. \*\*p < 0.01, \*\*\*p < 0.001, \*\*\*\*p < 0.0001. Data are representative of at least two independent experiments.

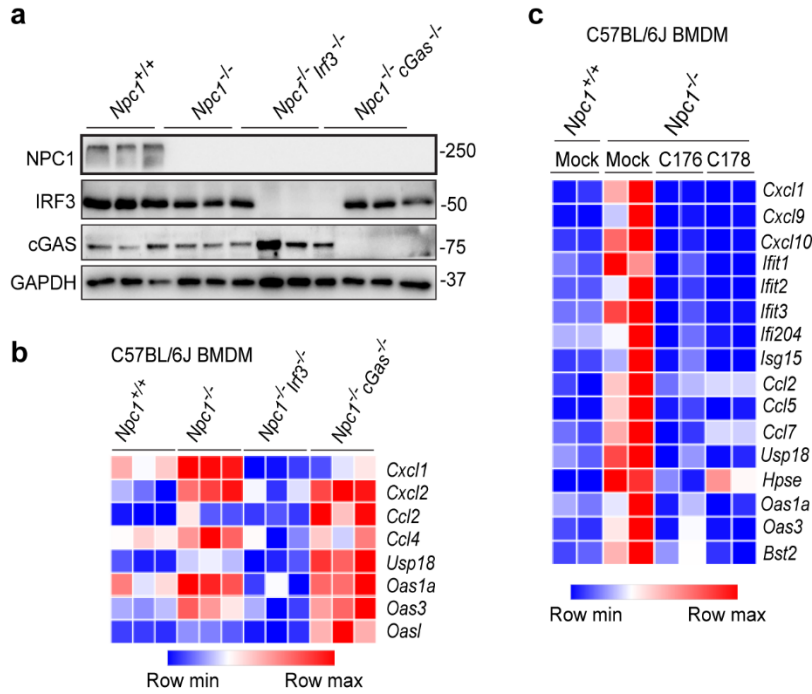

**Extended Data Fig.6| STING and IRF3, but not cGAS, is required for immune activation in *Npc1*<sup>-/-</sup> BMDMs.**

**a**, Immunoblot analysis of proteins (left) in whole brain lysates of indicated genotypes of mice (C57BL/6J, n=3).

**b**, A heatmap showing ISGs expression in indicated genotypes of mice BMDMs (C57BL/6J, n=3). Each ISG mRNA expression level was measured by qRT-PCR.

**c**, A heatmap showing ISG expression in *Npc1*<sup>+/+</sup> and *Npc1*<sup>-/-</sup> BMDMs mock-treated or treated with STING inhibitor C-176 (0.5 μM) or C-178 (0.5 μM) overnight (n=2). Each ISG mRNA expression was measured by qRT-PCR.



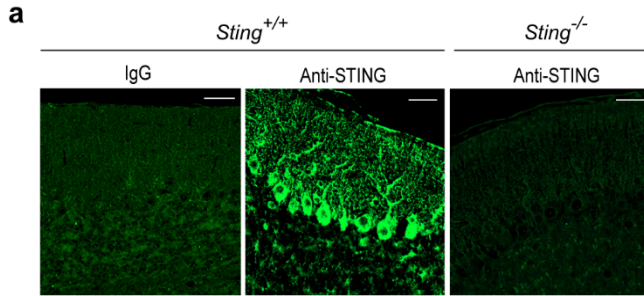

**Extended Data Fig.7| Validation of STING antibody for fluorescent IHC staining of mouse cerebellum.**

**a**, Fluorescent IHC staining with IgG (rabbit), anti-STING (rabbit) in WT C57BL/6J cerebellum or staining with anti-STING (rabbit) in *Sting*<sup>-/-</sup> C57BL/6J cerebellum. Scale bars, 30  $\mu$ m.

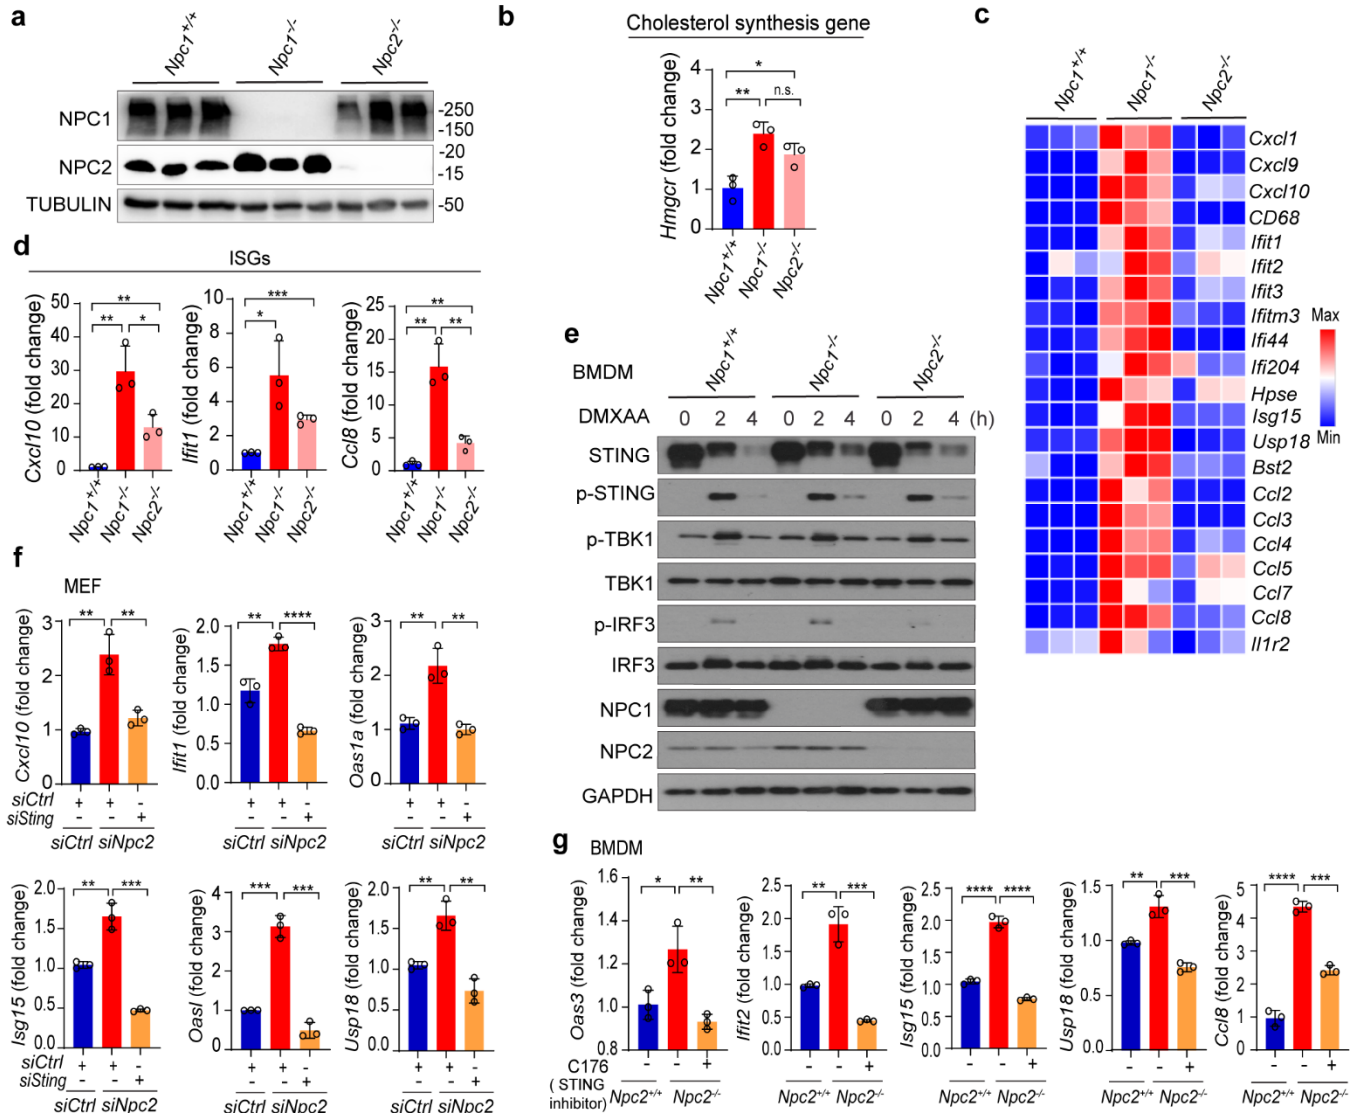

### Extended Data Fig. 8| STING signaling activation in *Npc1*<sup>-/-</sup> and *Npc2*<sup>-/-</sup> cells and mice.

- a**, Immunoblot analysis of proteins (left) in indicated genotype of BALB/c mouse whole brain lysates (n=3).
- b**, qRT-PCR analysis of cholesterol synthesis gene (*Hmgcr*) expression in the cerebellums of indicated genotype mice (BALB/c) (n=3)
- c**, A heatmap showing ISGs expression in BALB/c *Npc1*<sup>+/+</sup>, *Npc1*<sup>-/-</sup> and *Npc2*<sup>-/-</sup> mouse cerebellum (n=3). Each ISG mRNA expression was measured by qRT-PCR.
- d**, qRT-PCR analysis of some ISGs expression in the cerebellum of indicated genotype mice (BALB/c) (n=3).
- e**, Immunoblot analysis of the STING signaling cascade. BALB/c *Npc1*<sup>+/+</sup>, *Npc1*<sup>-/-</sup> and *Npc2*<sup>-/-</sup> mouse BMDMs were stimulated with DMXAA (50 µg/ml) for 0, 2, 4 h. Phospho- and total- proteins blotted are showing on the left.

**f**, qRT-PCR analysis of baseline ISGs expression in *Npc2*<sup>WT</sup>, *Npc2*<sup>KD</sup>, *Npc2*<sup>KD</sup>*Sting*<sup>KD</sup> MEFs (n=3).

**g**, qRT-PCR analysis of baseline ISGs expression in BALB/c *Npc1*<sup>+/+</sup> and *Npc2*<sup>-/-</sup> mouse BMDMs with mock-treated or treated with STING inhibitor C-176 (0.5 μM) overnight (n=3).

**b, d, f, g**, Data shown as means ± s.d. Unpaired two-tailed Student's t-test. \*p < 0.05, \*\*p < 0.01, \*\*\*p < 0.001, and \*\*\*\*p < 0.0001. Data are representative of at least two independent experiments.
